# Supplementary material for: In situ-formed hydroxyapatite and poly (lactic-co-glycolic acid) injectable implants as the cargo loading of bioactive substances for bone regeneration
Source: Royal Society of Chemistry journal article supplement (doi:10.1039/d3nj01195j), 2023-01-01
Supplement: d3nj01195j1.pdf [file d3nj01195j1.pdf]

## Supporting information

### **In situ formed hydroxyapatite and poly(lactic-co-glycolic acid) injectable implants as a potential cargo loading of bioactive substances for bone regeneration**

Zongliang Wang<sup>a,1</sup>, Ning Zhang<sup>b,1</sup>, Jianguo Liu<sup>c</sup>, Zhiqiang Xu<sup>d</sup>, Liqiang Wang<sup>e</sup>, Yu  
Wang<sup>a\*</sup>, Yifan Wang<sup>b\*</sup>, Peibiao Zhang<sup>a\*</sup>

<sup>a</sup>Key Laboratory of Polymer Ecomaterials, Changchun Institute of Applied Chemistry,  
Chinese Academy of Sciences, Changchun, 130022, PR China

<sup>b</sup>Department of Foot and Ankle Surgery, The Second Hospital of Shandong University,  
Jinan 250033, PR China

<sup>c</sup>Department of Orthopedics, The First Hospital of Jilin University, Changchun 130021,  
PR China

<sup>d</sup> Department of Rehabilitation Medicine, Foshan Hospital of Traditional Chinese  
Medicine, Foshan, 528000, PR China

<sup>e</sup> Department of Ophthalmology, Third Medical Center, Chinese PLA General Hospital,  
Beijing 100853, PR China

\*Corresponding Authors:

Peibiao Zhang, E-mail: zhangpb@ciac.ac.cn;

Yu Wang, E-mail: wydna@ciac.ac.cn;

Yifan Wang, E-mail: footandanklesurgeon@outlook.com.

<sup>1</sup> These authors contributed equally to this work.

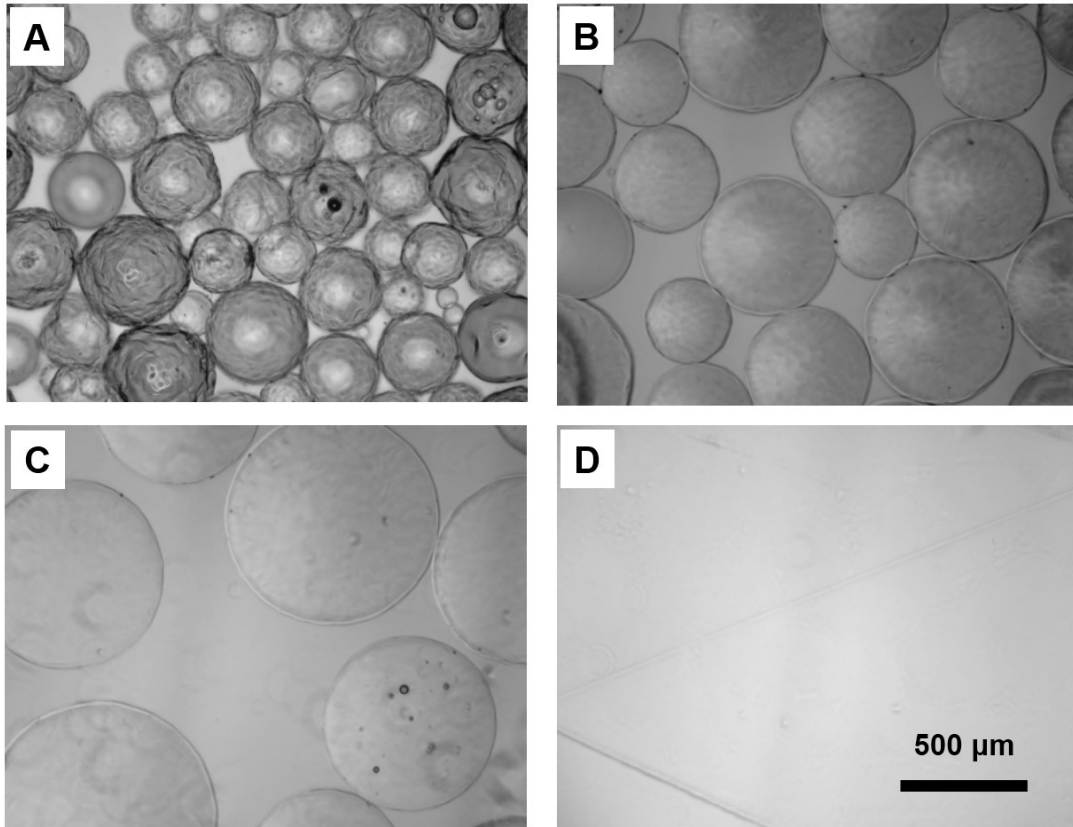

**Figure S1.** The optical observation of GMs (A) and the swelling of GMs in water for 5 (B), 10 (C) and 15 min (D). Scale bar lengths are 500 μm.
